# Supplementary material for: Structures and functions linked to genome-wide adaptation of human influenza A viruses
Source: PubMed Central journal article supplement (PMC6472403; doi:10.1038/s41598-019-42614-y), 2019-04-18
Supplement: 41598_2019_42614_MOESM1_ESM.pdf [file 41598_2019_42614_MOESM1_ESM.pdf]

# **Structures and functions linked to genome-wide adaptation of human influenza A viruses**

Thorsten R. Klingen<sup>1</sup>, Jens Loers<sup>1</sup>, Stephanie Stanelle-Bertram<sup>3</sup>, Gülsah Gabriel<sup>3,4</sup>

and Alice C. McHardy<sup>1,2†</sup>

<sup>1</sup>Department for Computational Biology of Infection Research, Helmholtz Center for Infection Research, Braunschweig, Germany

<sup>2</sup>German Center for Infection Research (DZIF), Braunschweig, Germany

<sup>3</sup>Heinrich Pette Institute, Leibniz Institute for Experimental Virology, Hamburg, Germany

<sup>4</sup>University of Veterinary Medicine, Hannover, Germany

†Correspondence to: [Alice.McHardy@helmholtz-hzi.de](mailto:Alice.McHardy@helmholtz-hzi.de)

Keywords: influenza A virus, positive selection, graph-cut, adaptation

## Supplementary Figure 1

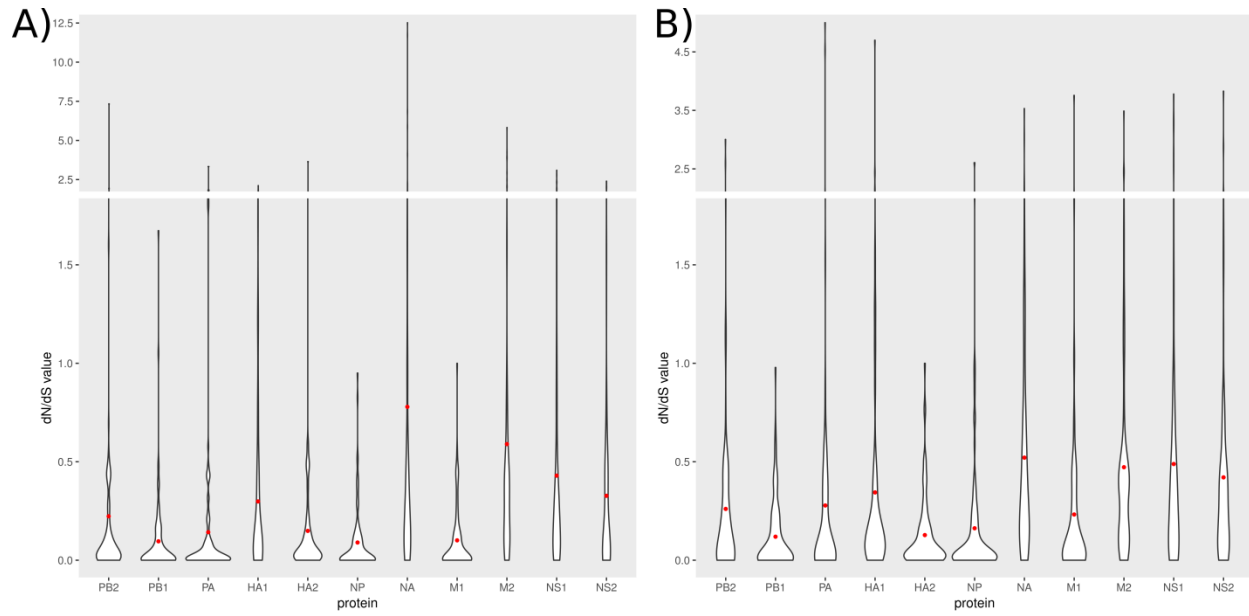

**Figure S1: Violin plots of  $dN/dS$  distribution.**

This figure illustrates the  $dN/dS$  distribution in violin plots for H3N2 (A) and pH1N1 (B) viruses. Red dots indicate the mean  $dN/dS$  value.

## Supplementary Figure 2

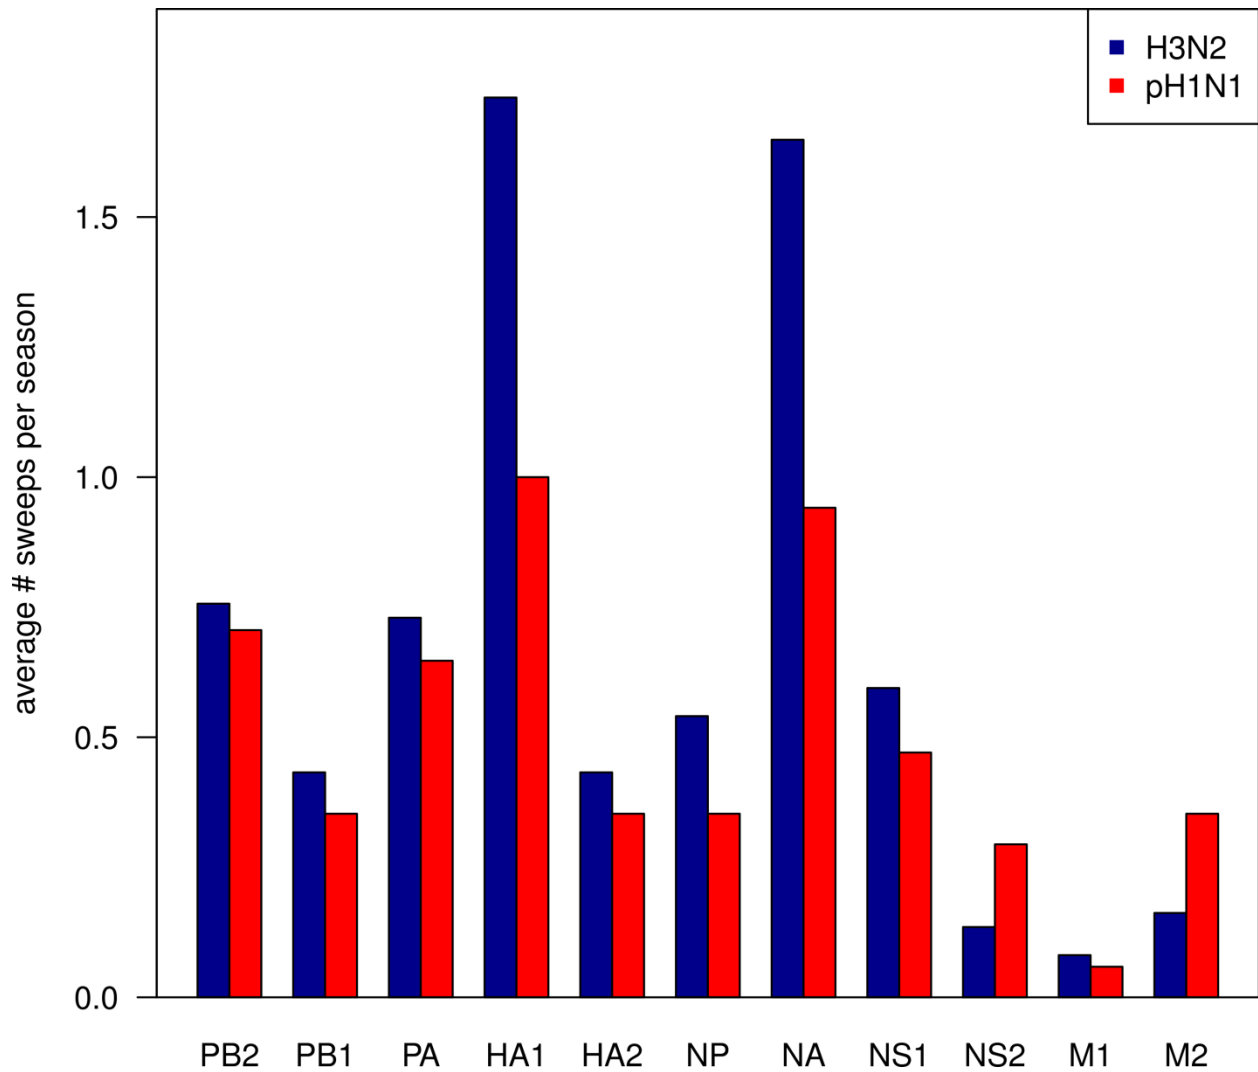

**Figure S2: Average number of sweep-related changes.**

The barplot show the average number of sweep-related changes per season for all proteins of H3N2 (**blue**) and pH1N1 (**red**) viruses.

Supplementary Table 1

| Protein    | Target Sequence            | Template Structures    | Template Region                                          | Template Sequence                                          | Sequence Identity | Region | Coverage |
|------------|----------------------------|------------------------|----------------------------------------------------------|------------------------------------------------------------|-------------------|--------|----------|
| <b>PB2</b> | A/California/07/2009(H1N1) | 4wsbC                  | 1-482, 491-741                                           | A/little yellow-shouldered bat/Guatemala/060/2010 (H17N10) | 67%               | 1-759  | 100%     |
| <b>PB1</b> |                            | 4wsbB                  | 1-194, 199-490, 492-647, 650-733, 736-754                |                                                            | 79%               | 1-757  | 100%     |
| <b>PA</b>  |                            | 4wsbA                  | 1-185, 204-714                                           |                                                            | 72%               | 1-716  | 100%     |
| <b>HA1</b> |                            | 3m6sA                  | 1-322                                                    | A/Darwin/2001/2009 (H1N1)                                  | 99%               | 1-326  | 99%      |
|            |                            | 3lzgA                  | 11-325                                                   | A/California/04/2009(H1N1)                                 | 99%               |        |          |
| <b>HA2</b> |                            | 3m6B                   | 1-170                                                    | A/Darwin/2001/2009 (H1N1)                                  | 98%               | 1-175  | 100%     |
|            |                            | 3lzgB                  | 1-175                                                    | A/California/04/2009(H1N1)                                 | 98%               |        |          |
| <b>NP</b>  |                            | 3ro5A                  | 22-71, 91-198, 212-429, 439-479, 485-497                 | A/Wilson-Smith/1933 (H1N1)                                 | 92%               | 21-498 | 96%      |
|            |                            | 3ro5B                  | 22-83, 88-199, 214-246, 248-393404-428, 441-479, 486-491 |                                                            | 92%               |        |          |
| <b>NA</b>  |                            | 4b7QA                  | 83-350, 352-469                                          | A/California/07/2009(H1N1)                                 | 100%              | 83-469 | 83%      |
| <b>M1</b>  |                            | 3md2A                  | 4-67, 77-85, 89-157                                      | A/California/04/2009 (H1N1)                                | 100%              | 1-157  | 62%      |
|            |                            | 5cqeA                  | 1-71, 73-158                                             | A/Puerto Rico /8/34(H1N1)                                  | 95%               |        |          |
| <b>M2</b>  |                            | 2n70A                  | 18, 20-30, 32-49, 51-60                                  | A/Udorn/307/1972(H3N2)                                     | 81%               | 18-62  | 47%      |
|            |                            | 2kihA                  | 23-30, 32-49, 51-60                                      |                                                            | 84%               |        |          |
|            |                            | 2l0jA                  | 22-49, 51-62                                             |                                                            | 83%               |        |          |
| <b>NS1</b> |                            | 3m5rB                  | 79-203                                                   | A/California/07/2009(H1N1)                                 | 100%              | 1-219  | 100%     |
|            |                            | 4opaB                  | 2-37, 41, 42-49, 85-203                                  | A/blue-winged teal/MN/993/1980(H6N6)                       | 84%               |        |          |
|            | 3m8aA                      | 1-72                   | A/California/07/2009(H1N1)                               | 100%                                                       |                   |        |          |
| <b>NS2</b> | 1pd3                       | 64-85, 87-103, 105-116 | A/Puerto Rico /8/1934(H1N1)                              | 96%                                                        | 64-114            | 42%    |          |

**Table S1: Overview of protein modeling for pH1N1 protein**

This table provides detailed information about the homology modeling of all pH1N1 proteins.

Supplementary Table 2

| Protein    | Target Sequence       | Template Structures | Template Region                           | Template Sequence                                          | Sequence Identity | Region | Coverage |
|------------|-----------------------|---------------------|-------------------------------------------|------------------------------------------------------------|-------------------|--------|----------|
| <b>PB2</b> | A/Aichi/2/1968 (H3N2) | 4wsbC               | 1-482, 491-741                            | A/little yellow-shouldered bat/Guatemala/060/2010 (H17N10) | 67%               | 1-759  | 100%     |
| <b>PB1</b> |                       | 4wsbB               | 1-194, 199-490, 492-647, 650-733, 736-754 |                                                            | 79%               | 1-757  | 100%     |
| <b>PA</b>  |                       | 4wsbA               | 1-185, 204-714                            |                                                            | 70%               | 1-716  | 100%     |
| <b>HA1</b> |                       | 3hmgA               | 1-225, 227-326                            | A/Aichi/2/1968 (H3N2)                                      | 100%              | 1-328  | 100%     |
| <b>HA2</b> |                       | 3hmgB               | 1-175                                     |                                                            | 100%              | 1-175  | 79%      |
| <b>NP</b>  |                       | 4x9aA               | 21-72, 92-202, 213-396, 403-428, 438-489  | A/Wilson-Smith/1933 (H1N1)                                 | 91%               | 21-498 | 96%      |
|            |                       | 3zdpB               | 21-391, 408-498                           |                                                            | 92%               |        |          |
| <b>NA</b>  |                       | 3tiaA               | 82-469                                    | A/RI/5+/1957 (H2N2)                                        | 88%               | 81-469 | 83%      |
|            |                       | 2aepA               | 82-469                                    | A/Memphis/31/98(H3N2)                                      | 98%               |        |          |
| <b>M1</b>  |                       | 1ea3                | 2-158                                     | A/Puerto Rico/8/1934 (H1N1)                                | 98%               | 1-160  | 63%      |
|            |                       | 5cqeB               | 1-159                                     |                                                            | 98%               |        |          |
| <b>M2</b>  |                       | 2ly0A               | 22-49, 51-62                              | A/Chiba/5/71 (H3N2)                                        | 97%               | 18-62  | 47%      |
|            |                       | 2n70A               | 18-60                                     | A/Udorn/307/1972(H3N2)                                     | 87%               |        |          |
| <b>NS1</b> |                       | 1ailA               | 1-70                                      | A/Udorn/307/1972 (H3N2)                                    | 90%               | 1-230  | 97%      |
|            |                       | 4ophA               | 2-37, 29-40, 42-203                       | A/blue-winged teal/MN/993/1980 (H6N6)                      | 85%               |        |          |
|            |                       | 3d6rB               | 83-202                                    | A/Duck/Alberta/60/1976 (H12N5)                             | 73%               |        |          |
|            |                       | 3ee9A               | 84-205                                    | A/Udorn/307/1972(H3N2)                                     | 94%               |        |          |
| <b>NS2</b> |                       | 1pd3                | 64-85, 87-103, 105-116                    | A/Puerto Rico /8/1934(H1N1)                                | 96%               | 63-116 | 45%      |

Table S2: Overview of protein modeling for H3N2 protein

This table provides detailed information about the homology modeling of all H3N2 proteins.

**Supplementary Table 3**

|            | <b>H3N2</b>  |                    | <b>pH1N1</b> |                    |
|------------|--------------|--------------------|--------------|--------------------|
|            | <b>dN/dS</b> | <b>HyPhy SCLAC</b> | <b>dN/dS</b> | <b>HyPhy SCLAC</b> |
| <b>PB2</b> | 0.223        | 0.283              | 0.260        | 0.480              |
| <b>PB1</b> | 0.096        | 0.204              | 0.119        | 0.220              |
| <b>PA</b>  | 0.142        | 0.212              | 0.277        | 0.455              |
| <b>HA1</b> | 0.298        | 0.522              | 0.344        | 0.506              |
| <b>HA2</b> | 0.148        | 0.206              | 0.127        | 0.231              |
| <b>NP</b>  | 0.089        | 0.127              | 0.162        | 0.269              |
| <b>NA</b>  | 0.778        | 0.688              | 0.520        | 0.950              |
| <b>M1</b>  | 0.100        | 0.208              | 0.232        | 0.350              |
| <b>M2</b>  | 0.589        | 1.812              | 0.472        | 1.242              |
| <b>NS1</b> | 0.429        | 0.589              | 0.488        | 0.977              |
| <b>NS2</b> | 0.327        | 0.774              | 0.420        | 0.611              |

**Table S3: Comparison of mean  $dN/dS$ .**

As a sanity check, we compared our results with the mean  $dN/dS$  value from the Suzuki-Gojobori counting approach implemented in HyPhy SLAC for all proteins.

## Supplementary Table 4

| <b>protein</b> | <b>p-value</b>    |
|----------------|-------------------|
| <b>PB2</b>     | $3 * 10^{-10}$    |
| <b>PB1</b>     | $2.7 * 10^{-7}$   |
| <b>PA</b>      | $4.97 * 10^{-9}$  |
| <b>HA1</b>     | $2.38 * 10^{-2}$  |
| <b>HA2</b>     | $6.005 * 10^{-1}$ |
| <b>NP</b>      | $1.46 * 10^{-3}$  |
| <b>NA</b>      | $1.33 * 10^{-2}$  |
| <b>M1</b>      | $65 * 10^{-5}$    |
| <b>M2</b>      | $6.89 * 10^{-1}$  |
| <b>NS1</b>     | $1.48 * 10^{-1}$  |
| <b>NS2</b>     | $15.34 * 10^{-4}$ |

**Table S4: Kolmogorov–Smirnov-test.**

We applied the Kolmogorov–Smirnov-test (KS-test;  $H_0$ :  $dN/dS$  distribution of pH1N1 protein is smaller than  $dN/dS$  distribution of H3N2 protein) to all proteins individually and showed that the global  $dN/dS$  distributions of pH1N1 proteins were significantly larger than those of H3N2 proteins, except for HA2, NS1 and M2.

### Supplementary Table 5

| <b>protein</b> | <b>p-value</b>    |
|----------------|-------------------|
| <b>PB2</b>     | $1.07 * 10^{-10}$ |
| <b>PB1</b>     | $6.23 * 10^{-7}$  |
| <b>PA</b>      | $7.17 * 10^{-4}$  |
| <b>HA1</b>     | $3.59 * 10^{-4}$  |
| <b>HA2</b>     | 0.27              |
| <b>NP</b>      | $2 * 10^{-2}$     |
| <b>NA</b>      | 0.99              |
| <b>M1</b>      | $7.28 * 10^{-5}$  |
| <b>M2</b>      | $2 * 10^{-3}$     |
| <b>NS1</b>     | $1 * 10^{-3}$     |
| <b>NS2</b>     | $2 * 10^{-3}$     |

**Table S5: Kolmogorov–Smirnov-test pandemic vs. post-pandemic phase**

We applied the Kolmogorov–Smirnov-test (KS-test;  $H_0$ :  $dN/dS$  distribution of pH1N1 protein during the pandemic is smaller than  $dN/dS$  distribution of pH1N1 protein after the pandemic) to all proteins individually and showed that the  $dN/dS$  distributions of pH1N1 proteins during the pandemic phase were significantly larger than the  $dN/dS$  distributions of pH1N1 proteins in the post-pandemic phase, except for HA2 and NA.



### Supplementary Table 6

| <b>protein</b> | <b>H3N2</b> | <b>pH1N1</b> |
|----------------|-------------|--------------|
| <b>PB2</b>     | 2.503 %     | 5.270 %      |
| <b>PB1</b>     | 1.453 %     | 2.113 %      |
| <b>PA</b>      | 2.094 %     | 4.748 %      |
| <b>HA1</b>     | 16.158 %    | 15.853 %     |
| <b>HA2</b>     | 1.142 %     | 0 %          |
| <b>NP</b>      | 0.602 %     | 3.815 %      |
| <b>NA</b>      | 7.675 %     | 8.955 %      |
| <b>M1</b>      | 0 %         | 1.587 %      |
| <b>M2</b>      | 11.340 %    | 12.371 %     |
| <b>NS1</b>     | 23.043 %    | 27.397 %     |
| <b>NS2</b>     | 0 %         | 0 %          |

**Table S6: Frequency of patch sites per protein.**

We list the ratio of patch sites to protein sites of the protein model for each protein individually.

Supplementary Table 7

|            |     | pH1N1     |         |         |          |           |                      |    | H3N2      |         |         |          |           |                      |
|------------|-----|-----------|---------|---------|----------|-----------|----------------------|----|-----------|---------|---------|----------|-----------|----------------------|
|            |     | Precision | Recall  | F-score | Accuracy | Stability | Average <i>dN/dS</i> |    | Precision | Recall  | F-score | Accuracy | Stability | Average <i>dN/dS</i> |
| <b>PB2</b> | 1.  | 0.89865   | 0.93489 | 0.91641 | 0.99938  | 1         | 1.79617              | 1. | 0.73694   | 0.88764 | 0.8053  | 0.99897  | 1         | 1.1482               |
|            | 2.  | 0.90602   | 0.94085 | 0.9231  | 0.99943  | 1         | 1.20104              | 2. | 0.80449   | 0.90809 | 0.85315 | 0.99924  | 1         | 1.21464              |
|            | 3.  | 0.7655    | 0.90618 | 0.82992 | 0.9991   | 1         | 1.17321              | 3. | 0.72584   | 0.9141  | 0.80916 | 0.99895  | 1         | 1.58804              |
|            | 4.  | 0.76449   | 0.90487 | 0.82877 | 0.99909  | 1         | 1.91548              | 4. | 1         | 0.89276 | 0.94334 | 0.99878  | 1         | 0.98501              |
|            | 5.  | 0.76293   | 0.90597 | 0.82832 | 0.99909  | 1         | 1.59852              | 5. | 0.80653   | 0.90255 | 0.85184 | 0.99924  | 1         | 2.31392              |
|            | 6.  | 0.78481   | 0.91676 | 0.84567 | 0.99918  | 1         | 1.07023              | 6. | 0.82359   | 0.91068 | 0.86495 | 0.9993   | 1         | 1.05223              |
|            | 7.  | 0.77196   | 0.90919 | 0.83498 | 0.99912  | 1         | 0.72867              |    |           |         |         |          |           |                      |
|            | 8.  | 0.74455   | 0.89222 | 0.81173 | 0.999    | 0.99136   | 0.92995              |    |           |         |         |          |           |                      |
|            | 9.  | 0.77124   | 0.90969 | 0.83477 | 0.99912  | 1         | 0.73048              |    |           |         |         |          |           |                      |
|            | 10. | 0.7507    | 0.9     | 0.8186  | 0.99904  | 1         | 1.09755              |    |           |         |         |          |           |                      |
|            | 11. | 0.73232   | 0.88789 | 0.80263 | 0.99895  | 1         | 1.05043              |    |           |         |         |          |           |                      |
|            | 12. | 0.89515   | 0.92904 | 0.91178 | 0.99934  | 1         | 1.54116              |    |           |         |         |          |           |                      |
|            | 13. | 0.75593   | 0.89884 | 0.82121 | 0.99905  | 1         | 0.70233              |    |           |         |         |          |           |                      |
|            | 14. | 0.89947   | 0.93168 | 0.91529 | 0.99937  | 1         | 0.91775              |    |           |         |         |          |           |                      |
|            | 15. | 0.73451   | 0.89063 | 0.80507 | 0.99897  | 1         | 4.04162              |    |           |         |         |          |           |                      |
|            | 16. | 0.74642   | 0.89878 | 0.81554 | 0.99902  | 1         | 1.38535              |    |           |         |         |          |           |                      |
|            | 17. | 0.98371   | 0.96928 | 0.97644 | 0.99977  | 1         | 1.10768              |    |           |         |         |          |           |                      |
| <b>PB1</b> | 1.  | 0.819     | 0.90447 | 0.85962 | 0.99928  | 1         | 1.46251              | 1. | 0.79183   | 0.89176 | 0.83883 | 0.99918  | 1         | 2.71937              |
|            | 2.  | 0.795     | 0.89176 | 0.8406  | 0.99919  | 1         | 2.07695              | 2. | 0.79582   | 0.89324 | 0.84172 | 0.99919  | 1         | 1.17066              |
|            | 3.  | 0.607     | 0.67821 | 0.64063 | 0.99816  | 0.75686   | 0.56816              | 3. | 0.78486   | 0.87604 | 0.82795 | 0.99912  | 0.97164   | 1.347                |
|            | 4.  | 0.803     | 0.89521 | 0.8466  | 0.99922  | 1         | 2.33944              | 4. | 0.98152   | 0.59828 | 0.74341 | 0.99743  | 1.99346   | 1.78638              |
|            | 5.  | 0.817     | 0.90376 | 0.85819 | 0.99927  | 1         | 1.20138              |    |           |         |         |          |           |                      |
|            | 6.  | 0.90325   | 0.91508 | 0.90912 | 0.99933  | 1         | 0.9506               |    |           |         |         |          |           |                      |

|            |     |         |         |         |         |         |         |     |         |         |         |         |         |         |
|------------|-----|---------|---------|---------|---------|---------|---------|-----|---------|---------|---------|---------|---------|---------|
|            | 7.  | 0.783   | 0.88027 | 0.82879 | 0.99913 | 1       | 1.64516 |     |         |         |         |         |         |         |
| <b>PA</b>  | 1.  | 0.8056  | 0.89456 | 0.84775 | 0.99918 | 1       | 1.29466 | 1.  | 0.61646 | 0.93557 | 0.74321 | 0.99835 | 1       | 0.94922 |
|            | 2.  | 0.84558 | 0.92007 | 0.88125 | 0.99935 | 1       | 0.73796 | 2.  | 0.7854  | 0.89539 | 0.83679 | 0.99911 | 1       | 1.59671 |
|            | 3.  | 0.81159 | 0.90272 | 0.85474 | 0.99921 | 1       | 1.35054 | 3.  | 0.62174 | 0.9416  | 0.74895 | 0.99838 | 1       | 0.88074 |
|            | 4.  | 0.8046  | 0.89694 | 0.84826 | 0.99918 | 1       | 1.4778  | 4.  | 0.89505 | 0.65918 | 0.75922 | 0.99837 | 1       | 1.05252 |
|            | 5.  | 0.97066 | 0.98548 | 0.97802 | 0.99983 | 1       | 1.29668 | 5.  | 0.81995 | 0.90829 | 0.86186 | 0.99925 | 1       | 0.60085 |
|            | 6.  | 0.89225 | 0.9011  | 0.89665 | 0.99919 | 1       | 0.57344 | 6.  | 0.80758 | 0.899   | 0.85084 | 0.99919 | 1       | 1.50513 |
|            | 7.  | 0.97588 | 0.95062 | 0.96308 | 0.99932 | 1       | 1.04651 | 7.  | 0.40107 | 0.99945 | 0.57242 | 0.99616 | 1       | 0.8206  |
|            | 8.  | 0.803   | 0.89571 | 0.84682 | 0.99917 | 1       | 0.76832 |     |         |         |         |         |         |         |
|            | 9.  | 0.841   | 0.91562 | 0.87673 | 0.99933 | 1       | 1.33694 |     |         |         |         |         |         |         |
|            | 10. | 0.92322 | 0.93484 | 0.92899 | 0.99945 | 1       | 1.95201 |     |         |         |         |         |         |         |
|            | 11. | 0.99614 | 0.99641 | 0.99628 | 0.99996 | 1       | 1.7039  |     |         |         |         |         |         |         |
|            | 12. | 0.797   | 0.8945  | 0.84294 | 0.99915 | 1       | 0.79982 |     |         |         |         |         |         |         |
| <b>HA1</b> | 1.  | 0.68887 | 0.88763 | 0.77572 | 0.99715 | 1       | 1.09228 | 1.  | 0.99328 | 0.95434 | 0.97342 | 0.99926 | 1       | 0.88453 |
|            | 2.  | 0.99257 | 0.99421 | 0.99339 | 0.99985 | 1       | 1.59415 | 2.  | 0.82742 | 0.92073 | 0.87159 | 0.99771 | 1       | 1.21967 |
|            | 3.  | 0.7831  | 0.90859 | 0.84119 | 0.99806 | 1       | 0.74958 | 3.  | 0.68574 | 0.91079 | 0.7824  | 0.99715 | 1       | 1.11964 |
|            | 4.  | 0.98538 | 0.86113 | 0.91908 | 0.99645 | 1.02148 | 1.06979 | 4.  | 0.72724 | 0.83498 | 0.7774  | 0.99593 | 0.88579 | 0.74254 |
|            | 5.  | 0.75755 | 0.89471 | 0.82043 | 0.9978  | 1       | 2.15426 | 5.  | 0.99642 | 0.99917 | 0.99779 | 0.99995 | 1       | 1.23302 |
|            | 6.  | 0.96973 | 0.98811 | 0.97883 | 0.99964 | 1       | 3.14461 | 6.  | 0.99775 | 0.98032 | 0.98896 | 0.99962 | 1       | 0.91345 |
|            | 7.  | 0.76574 | 0.90139 | 0.82805 | 0.9979  | 1       | 4.48946 | 7.  | 0.32865 | 0.5948  | 0.42337 | 0.99091 | 0.62621 | 0.69681 |
|            | 8.  | 0.99136 | 0.9209  | 0.95483 | 0.99875 | 1       | 2.31625 | 8.  | 1       | 0.88764 | 0.94048 | 0.99601 | 1       | 1.33813 |
|            | 9.  | 0.99904 | 0.86652 | 0.92807 | 0.99684 | 1.00924 | 1.27182 | 9.  | 0.65854 | 0.89158 | 0.75754 | 0.99678 | 0.98301 | 2.92006 |
|            | 10. | 1       | 0.94825 | 0.97344 | 0.99847 | 1       | 1.00421 | 10. | 0.83859 | 0.92624 | 0.88024 | 0.99787 | 1       | 2.13886 |
|            | 11. | 0.98451 | 0.94756 | 0.96568 | 0.99923 | 1       | 2.19452 | 11. | 0.98462 | 0.94567 | 0.96475 | 0.9986  | 1       | 1.18845 |
|            | 12. | 0.75775 | 0.89766 | 0.82179 | 0.99781 | 1       | 2.22453 | 12. | 0.65286 | 0.89832 | 0.75617 | 0.99678 | 1       | 0.89678 |
|            |     |         |         |         |         |         |         | 13. | 0.66394 | 0.90183 | 0.76482 | 0.99689 | 1       | 0.73665 |
| <b>HA2</b> |     |         |         |         |         |         | 1.      |     |         |         |         |         |         |         |

|           |     |         |         |         |         |         |         |    |         |         |         |         |         |         |  |
|-----------|-----|---------|---------|---------|---------|---------|---------|----|---------|---------|---------|---------|---------|---------|--|
| <b>NP</b> | 1.  | 0.89932 | 0.93353 | 0.91611 | 0.99901 | 1       | 0.92948 | 1. | 1       | 0.93461 | 0.9662  | 0.99962 | 1       | 1.71105 |  |
|           | 2.  | 0.88013 | 0.91879 | 0.89904 | 0.9988  | 1       | 1.88129 |    |         |         |         |         |         |         |  |
|           | 3.  | 0.71474 | 0.88539 | 0.79097 | 0.99822 | 0.99873 | 0.92798 |    |         |         |         |         |         |         |  |
|           | 4.  | 0.96381 | 0.98411 | 0.97385 | 0.99969 | 0.99728 | 0.70311 |    |         |         |         |         |         |         |  |
|           | 5.  | 0.99357 | 0.98395 | 0.98874 | 0.99982 | 1       | 1.02285 |    |         |         |         |         |         |         |  |
|           | 6.  | 0.75756 | 0.90394 | 0.8243  | 0.99852 | 1       | 1.85452 |    |         |         |         |         |         |         |  |
|           | 7.  | 0.76345 | 0.9148  | 0.8323  | 0.99856 | 1       | 0.98319 |    |         |         |         |         |         |         |  |
| <b>NA</b> | 1.  | 0.97728 | 0.98998 | 0.98359 | 0.99976 | 1       | 0.94483 | 1. | 0.9594  | 0.98852 | 0.97374 | 0.99962 | 1       | 0.86846 |  |
|           | 2.  | 0.76328 | 0.90298 | 0.82727 | 0.9982  | 1       | 1.23092 | 2. | 0.9884  | 0.99279 | 0.99059 | 0.99982 | 1       | 2.93439 |  |
|           | 3.  | 0.96974 | 0.95065 | 0.9601  | 0.99924 | 0.99544 | 0.81095 | 3. | 0.96802 | 0.9885  | 0.97815 | 0.99969 | 1       | 0.73076 |  |
|           | 4.  | 0.70769 | 0.95267 | 0.8121  | 0.99789 | 1       | 0.86562 | 4. | 1       | 0.91162 | 0.95377 | 0.99758 | 1       | 1.30683 |  |
|           | 5.  | 0.73895 | 0.89213 | 0.80835 | 0.99801 | 1       | 1.68588 | 5. | 0.75186 | 0.89789 | 0.81841 | 0.99812 | 0.99753 | 0.76207 |  |
|           | 6.  | 0.99955 | 0.99866 | 0.99911 | 0.99998 | 1       | 0.96226 | 6. | 0.75105 | 0.89816 | 0.81804 | 0.99812 | 1       | 1.89124 |  |
|           | 7.  | 0.75303 | 0.90028 | 0.8201  | 0.99813 | 1       | 3.80419 | 7. | 0.99597 | 0.98429 | 0.99009 | 0.99976 | 1       | 0.67372 |  |
|           | 8.  | 0.87081 | 0.91592 | 0.89279 | 0.99844 | 0.99157 | 1.25152 | 8. | 0.97104 | 0.94528 | 0.95799 | 0.99879 | 1       | 2.15367 |  |
|           | 9.  | 0.67306 | 0.92936 | 0.78071 | 0.99751 | 0.99878 | 0.75984 |    |         |         |         |         |         |         |  |
|           | 10. | 0.74231 | 0.90568 | 0.8159  | 0.99805 | 1       | 2.10581 |    |         |         |         |         |         |         |  |
|           | 11. | 0.55908 | 0.70719 | 0.62448 | 0.99598 | 0.79151 | 2.28639 |    |         |         |         |         |         |         |  |
|           | 12. | 0.75012 | 0.89321 | 0.81544 | 0.99808 | 1       | 2.8016  |    |         |         |         |         |         |         |  |
|           | 13. | 0.98963 | 0.97461 | 0.98207 | 0.99966 | 1       | 1.15015 |    |         |         |         |         |         |         |  |
|           | 14. | 0.98198 | 0.94913 | 0.96527 | 0.99934 | 1       | 1.70656 |    |         |         |         |         |         |         |  |
|           | 15. | 0.97456 | 0.9904  | 0.98242 | 0.99975 | 1       | 0.8061  |    |         |         |         |         |         |         |  |
| <b>M1</b> | 1.  | 0.82067 | 0.76863 | 0.7938  | 0.99534 | 0.85414 | 1.25181 |    |         |         |         |         |         |         |  |
|           | 2.  | 0.81235 | 0.76297 | 0.78689 | 0.99519 | 0.85393 | 2.20936 |    |         |         |         |         |         |         |  |
| <b>M2</b> | 1.  | 0.66056 | 0.97479 | 0.78749 | 0.96726 | 0.97724 | 1.11922 | 1. | 0.84851 | 0.98954 | 0.91362 | 0.98408 | 1       | 1.24919 |  |
|           | 2.  | 0.79189 | 0.96334 | 0.86924 | 0.95693 | 1       | 1.55141 | 2. | 0.9532  | 0.88313 | 0.91683 | 0.97572 | 1       | 1.8053  |  |
|           | 3.  | 0.33604 | 0.90235 | 0.48971 | 0.92226 | 0.98922 | 1.36896 |    |         |         |         |         |         |         |  |

|            |     |         |         |         |         |         |         |    |         |         |         |         |         |         |
|------------|-----|---------|---------|---------|---------|---------|---------|----|---------|---------|---------|---------|---------|---------|
| <b>NS1</b> | 1.  | 0.99723 | 0.99917 | 0.9982  | 0.99994 | 1       | 1.0147  | 1. | 0.96081 | 0.99191 | 0.97611 | 0.99941 | 1       | 1.42656 |
|            | 2.  | 0.98196 | 0.9975  | 0.98967 | 0.99965 | 1       | 1.39652 | 2. | 0.75012 | 0.90055 | 0.81848 | 0.9968  | 1       | 1.15162 |
|            | 3.  | 0.86623 | 0.93089 | 0.8974  | 0.9973  | 1       | 1.8717  | 3. | 0.99824 | 0.85413 | 0.92058 | 0.99125 | 1.00844 | 1.152   |
|            | 4.  | 0.99633 | 0.93063 | 0.96236 | 0.99713 | 1       | 1.25332 | 4. | 0.9955  | 0.85718 | 0.92118 | 0.99512 | 1.08145 | 1.20051 |
|            | 5.  | 0.9681  | 0.99083 | 0.97933 | 0.99947 | 1       | 1.16333 | 5. | 0.57138 | 0.8852  | 0.69448 | 0.99385 | 0.99873 | 1.2421  |
|            | 6.  | 0.65033 | 0.91204 | 0.75927 | 0.99512 | 1       | 1.60585 | 6. | 0.73052 | 0.87679 | 0.797   | 0.99641 | 0.96024 | 2.02527 |
|            | 7.  | 0.61437 | 0.82074 | 0.70272 | 0.99415 | 0.90732 | 2.26452 | 7. | 0.98704 | 0.86791 | 0.92365 | 0.99151 | 1       | 1.25578 |
|            | 8.  | 0.98586 | 0.98668 | 0.98627 | 0.99953 | 1       | 1.10176 | 8. | 0.61473 | 0.79867 | 0.69473 | 0.99438 | 0.88049 | 0.69069 |
|            | 9.  | 0.98833 | 0.84102 | 0.90874 | 0.98474 | 1       | 1.96486 | 9. | 0.99044 | 0.98198 | 0.98619 | 0.99932 | 1       | 2.99836 |
|            | 10. | 0.99812 | 0.92083 | 0.95792 | 0.99754 | 1       | 2.5686  |    |         |         |         |         |         |         |
|            | 11. | 0.71206 | 0.90819 | 0.79825 | 0.99614 | 1       | 2.15917 |    |         |         |         |         |         |         |

**Table S7: Overview of all quality measurements per patch.**

This is a detailed overview providing the precision, recall, F-score, stability and the average  $dN/dS$  of all patches.
